# Supplementary material for: MMP14 expression and collagen remodelling support uterine leiomyosarcoma aggressiveness
Source: PubMed Central journal article supplement (PMC10994236; doi:10.1002/1878-0261.13440), 2023-04-28

# Supplementary Figures

## ***MMP14* expression and collagen remodelling support uterine leiomyosarcoma aggressiveness**

Jordi Gonzalez-Molina , Paula Hahn, Raul Maia Falcão , Okan Gultekin , Georgia Kokaraki ,  
Valentina Zanfagnin, Tirzah Braz Petta , Kaisa Lehti, Joseph W. Carlson

**Supplementary Fig. 1**

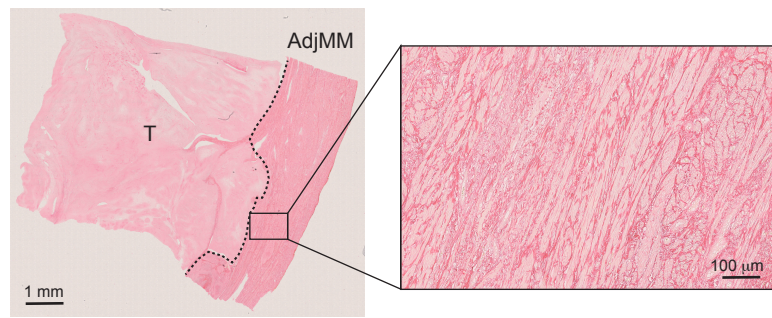

## Supplementary Fig. 2

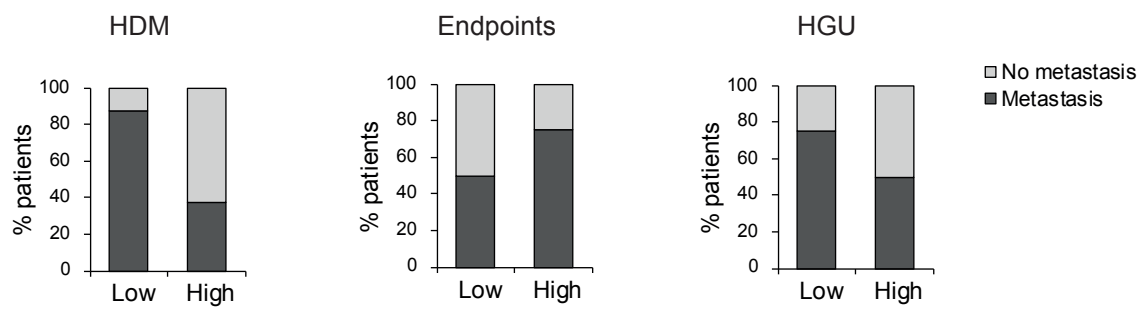

# Supplementary Fig. 3

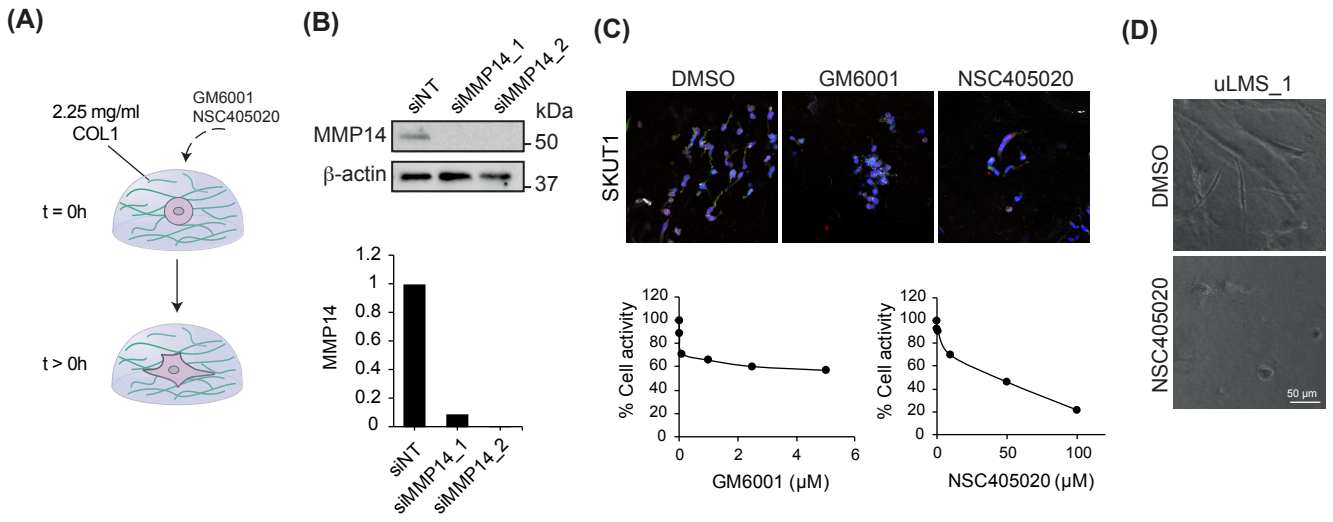

# Supplementary Fig. 4

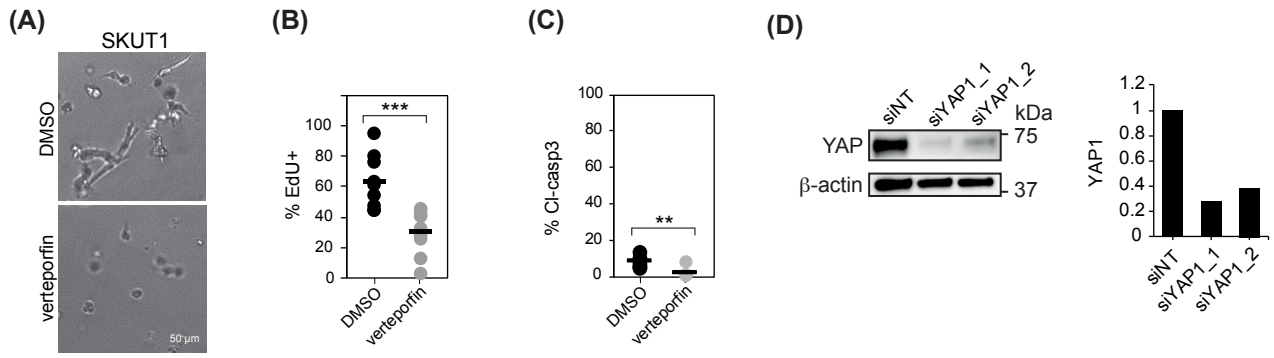

## Supplementary Fig. 5

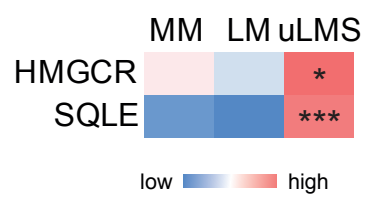

Supplement: MOL2-18-850-s002.pdf [file MOL2-18-850-s002.pdf]
